# Supplementary material
Source: PubMed Central journal article supplement (PMC4027581)
Supplement: ml500002n_si_001.pdf [file ml500002n_si_001.pdf]

## Supporting Information

### Discovery of BI 224436, a Non-Catalytic Site Integrase Inhibitor (NCINI) of HIV-1 Integrase LTR DNA 3'-Processing.

Lee D. Fader\*<sup>†</sup>, Eric Malenfant, Mathieu Parisien, Rebekah Carson, François Bilodeau, Serge Landry, Marc Pesant, Christian Brochu, Sébastien Morin, Catherine Chabot, Ted Halmos, Yves Bousquet, Murray D. Bailey, Stephen H. Kawai<sup>‡</sup>, René Coulombe, Steven LaPlante, Araz Jakalian, Punit K. Bhardwaj<sup>†</sup>, Dominik Wernic<sup>‡</sup>, Patricia Schroeder<sup>||</sup>, Ma'an Amad, Paul Edwards, Michel Garneau, Jianmin Duan, Michael Cordingley, Richard Bethell, Stephen W. Mason<sup>‡</sup>, Michael Bös, Pierre Bonneau, Marc-André Poupart, Anne-Marie Faucher, Bruno Simoneau, Craig Fenwick, Christiane Yoakim and Youla Tsanttrizos<sup>†</sup>.

#### General.

All compounds were prepared as previously described.<sup>1-3</sup> NMR spectra were recorded on a Bruker AVANCEII (400 MHz for <sup>1</sup>H NMR, 100 MHz for <sup>13</sup>C NMR) spectrometer and were referenced to DMSO-d<sup>6</sup> (2.50 ppm). Data are reported as follows: chemical shift (ppm), multiplicity (s=singlet, d=doublet, t=triplet, br=broad, m=multiplet), integration, and coupling constant (J, reported to the nearest 0.1Hz). UPLC-MS were obtained on a Waters ACQUITY UPLC<sup>®</sup> System, using ESI+/- ion mode, a BEH column (2.1x50mm C18, 1.7um particle diameter) and the following gradient: 90%A to 100%B in 1.19 minutes hold at 100%B to 1.70 minutes and a flow rate of 0.8mL/min (A=95:5 Water/Acetonitrile with 0.05% Formic Acid; B= Acetonitrile with 0.05% Formic Acid). High resolution mass spectra were obtained on a Thermo Fisher Scientific LTQ OrbiTrap XL using a mobile phase of 85:15 water:CAN. The detector was set to positive ion mode (ESI source).

#### Synthetic Approaches.<sup>1</sup>

The NCINI class of inhibitor was divided into three strategic substructures for modification: the C3 acetic acid moiety, the C4 arene and the B-ring. We devised three routes to introduce these substructures late in the synthetic sequence. In the first approach designed to prepare analogs of the C3 substituent, anthranilic acid-derived Weinreb amides **S2** were reacted with a metallated arene **S3** (M = Li or Mg) to give polysubstituted benzophenones **S4**, establishing the B-ring and C4-aryl substitution patterns (Scheme S1). Condensation with levulinic acid then gave compound **S1** (R<sup>6</sup> = Cl, X = Y = H). For further modification of the C3 position, the methyl ester of compound **S1** was prepared and then a range of chemical transformations at the  $\alpha$ -position were performed to give ester **S5**, which was saponified to give acid **S6**. Alternatively, compound **S4** was condensed with ethyl acetoxyacetate to provide ketone **S7**, which then underwent a range of transformations to give compound **S6**.

**Scheme S1. Late stage modification at the C3 position.**

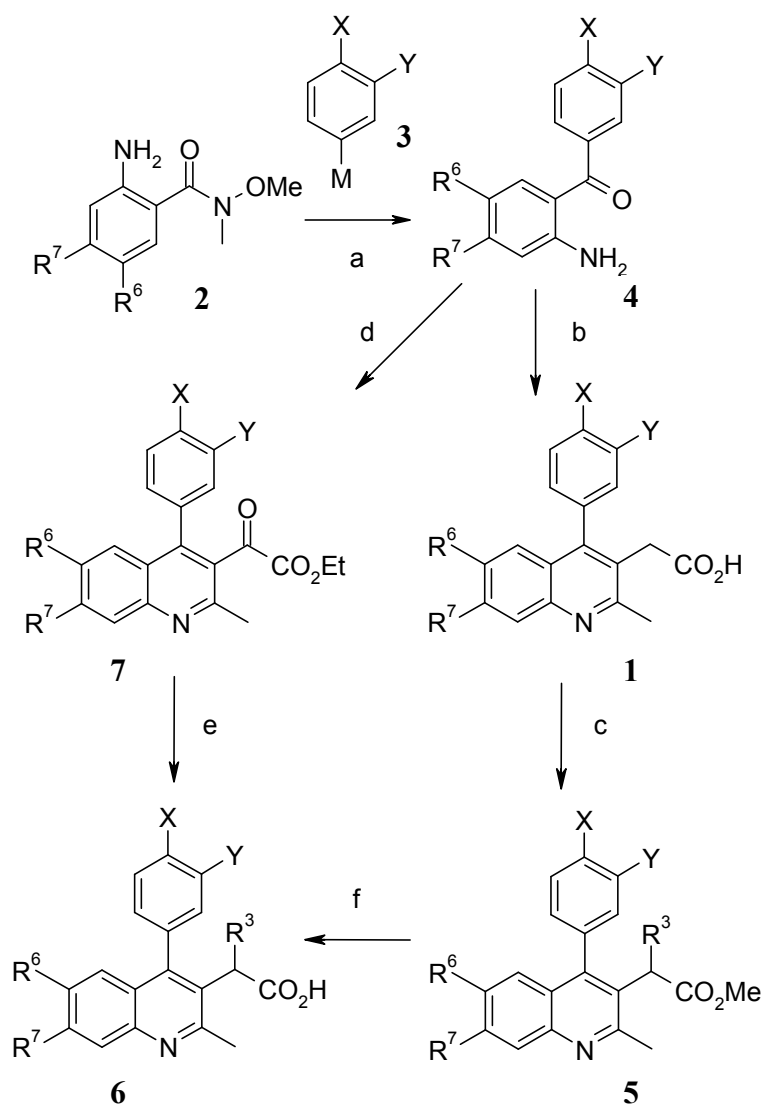

Conditions: a) **S2** + **S3**, THF, 0 °C to rt, 20-85%; b) levulinic acid,  $H_2SO_4$ , AcOH,  $\Delta$ , 17-87%; c) i.  $CH_2N_2/Et_2O$ ; ii. see refs. 2-4; d) ethyl acetopyruvate,  $H_2SO_4$ , AcOH,  $\Delta$ , 16-70%; e) see refs. 2-4; f) NaOH, THF,  $H_2O$  50-95%.

When late stage introduction of the C4 arene is preferred, aniline **S8** was condensed with diethyl acetosuccinate to give quinoline **S9** (Scheme S2). The phenol was then converted to the corresponding iodide and then the R3 substituent was installed by one of a number of transformations to give compound **S10**. Suzuki coupling to give biaryl **S11** followed by saponification then yielded carboxylic acid **S12**. When convenient, iodide **S10** was also prepared from hydroxyquinoline **S13**.

**Scheme S2. Late stage introduction of the C4-arene.**

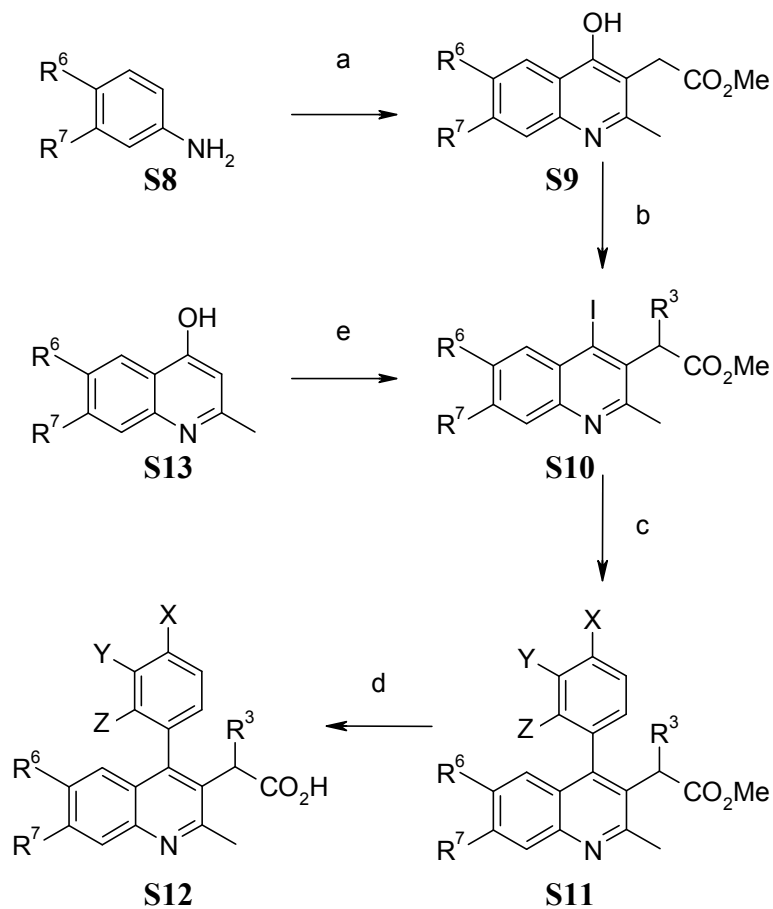

Conditions: a) **S8** + diethyl acetosuccinate,  $\text{Ph}_2\text{O}$ ,  $\Delta$ , 19-79%; b) i.  $\text{POCl}_3$ ,  $\Delta$ , 27-97%; ii.  $\text{HCl}$ ,  $\text{NaI}$ ,  $\Delta$ , 75-98%; iii.  $\text{LiHMDS}$ , Davis reagent,  $\text{THF}$ , 23-86%; iv) see ref. 3; c)  $\text{Ar-B(OR)}_2$ ,  $\text{Pd[PPh}_3\text{]}_4$ ,  $\text{Na}_2\text{CO}_3$ ,  $\text{DMF/H}_2\text{O}$ ,  $\Delta$  or  $\mu\text{W}$ , 22-97%; d)  $\text{NaOH}$ ,  $\text{THF/H}_2\text{O}$ .; e) see ref. 2-4.

When exploring the substitution pattern on the B-ring, a third route beginning with the conversion of Ley's aldehyde **S14**<sup>5</sup> to alkyne **S15** also proved useful (Scheme S3). Deprotection of the diol, acylation of the primary alcohol and etherification of the remaining secondary alcohol then gave compound **S16**. The C4 arene was then introduced with a Sonogashira coupling to give internal alkyne **S17**. Late stage introduction of the B-ring using Movassaghi's quinoline synthesis involving activation of anilide **S18** and formal cyclocondensation with alkyne **S17** then gave compound **S19**.<sup>6</sup> The success of this approach was contingent on one of X or Y being an electron-donating group, as originally described.<sup>6</sup> Finally, removal of the Piv group and oxidation provided carboxylic acid **S20**.

### Scheme 3. Late stage B-ring modification

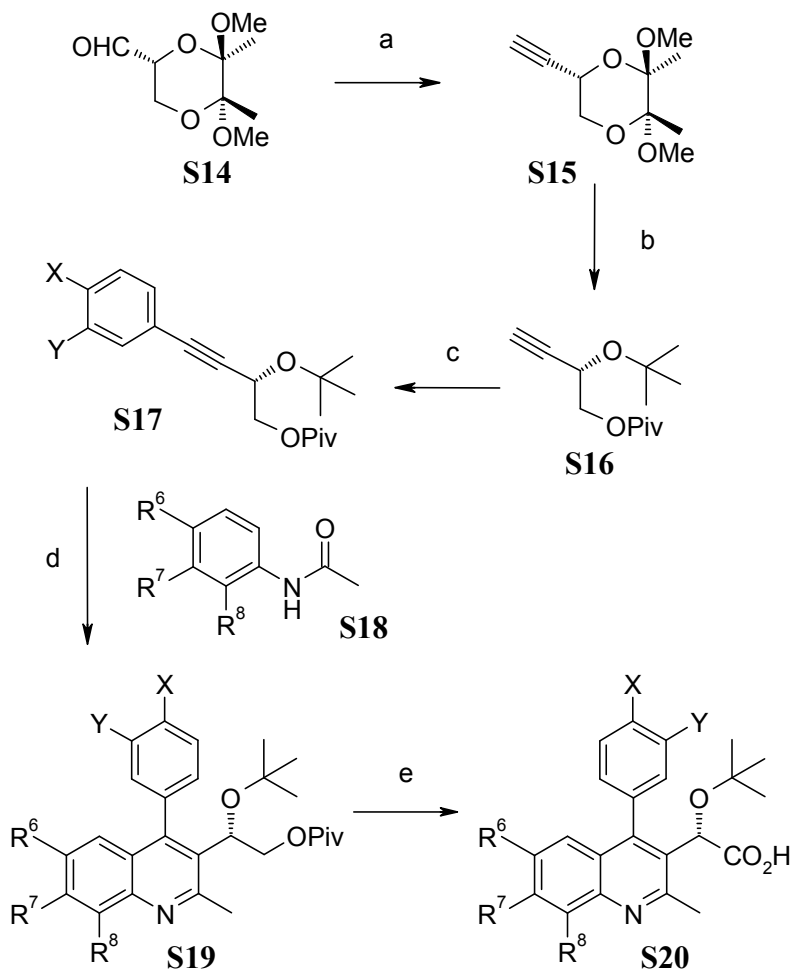

Conditions: a) Bestmann-Ohira reagent, MeOH,  $K_2CO_3$ , 53-97%; b) i. AcOH/ $H_2O$ ,  $\Delta$ , 35-68%; ii. PivCl, DIPEA, DCM, 40-58%; iii. isobutene, hexane,  $HClO_4$ , 74-95%; c) Ar-I,  $Pd[PPh_3]_4$ ,  $Et_2NH$ ,  $\Delta$ , 54-95%; d) **S18**, 2-ClPyr,  $Tf_2O$ , then **S17**, 47-93%; e) i.  $LiBH_4/THF$ , 49-92%; ii. Dess-Martin periodinane, iii.  $NaClO_2$ ,  $NaH_2PO_4$ , 1-methyl-1-cyclohexene, *i*BuOH/ $H_2O$ , 25-56% (2 steps).

**Table S1. *In vitro* ADME profile of compounds 16 and 19.**

|                                               | 16        | 19        |
|-----------------------------------------------|-----------|-----------|
| $EC_{50}$ range, <sup>a</sup> nM              | 23-110    | 13-130    |
| HLM / RLM ( $t_{1/2}$ ), min                  | 82 / 130  | 230 / 160 |
| Caco-2 ( $P_{app}$ ), $\times 10^6$ , cm/s    | 23        | 14        |
| CyP450 inh. ( $IC_{50}$ , 3A4 / 2D6), $\mu M$ | >30 / >30 | 26 / >30  |
| Solubility <sup>b</sup> (pH = 6.8), mg/mL     | >1.0      | 0.70      |

<sup>a</sup> Determined with HxB2 virus (A124/T125 IN variant), NL4.3 virus (T124/T125 variant) or recombinant NL4.3 virus (T124A, T124A/T125A, T124N or T124N/T125A IN mutants). <sup>b</sup> For the amorphous powder.

## Characterization of selected representative compounds.

### Compound 8:

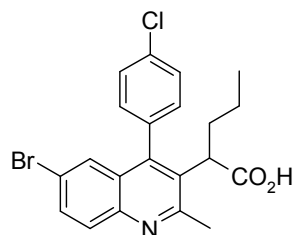

**8**

$^1\text{H}$  NMR: 12.7 (br, 1H), 7.92 (d, 1H, 8.9 Hz), 7.86-7.83 (m, 1H), 7.70-7.66 (m, 2H), 7.37-7.35 (m, 1H), 7.31-7.28 (m, 1H), 7.23 (d, 1H,  $J = 2.2$  Hz), 3.64 (br, 1H), 2.64 (s, 3H), 2.06-2.04 (m, 1H), 1.55 (s, 1H), 1.10-0.88 (m, 2H), 0.65 (t, 3H,  $J = 7.2$ ).  $^{13}\text{C}$  NMR: 174.0, 158.5, 145.6, 143.6, 134.4, 133.5, 132.4, 131.8, 131.5, 131.1, 130.1, 129.1, 128.8, 127.7, 127.3, 119.5, 46.0, 31.9, 24.0, 20.7, 13.7. HRMS:  $m/z$  calc. for  $\text{C}_{21}\text{H}_{19}\text{BrClNO}_2 + \text{H}^+$ : 432.0360,  $m/z$  found: 432.0347 (-3.1 ppm). UPLC-MS:  $rt = 1.25$  min,  $m/z$  432.1  $[\text{M} + \text{H}]^+$ , purity: >99.9% @ 254 nm.

### Compound 13:

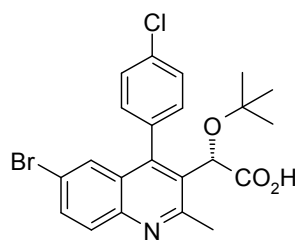

**13**

$^1\text{H}$  NMR: 13.1 (br, 1H), 7.93 (d, 1H,  $J = 8.9$  Hz), 7.88-7.85 (m, 1H), 7.75-7.68 (m, 2H), 7.47-7.44 (m, 2H), 7.33 (d, 1H,  $J = 2.0$  Hz), 4.97 (s, 1H), 2.73 (s, 3H), 0.90 (s, 9H). HRMS:  $m/z$  calc. for  $\text{C}_{22}\text{H}_{21}\text{BrClNO}_3 + \text{H}^+$ : 462.0466,  $m/z$  found: 462.0451 (-3.3 ppm). UPLC-MS:  $rt = 1.27$  min,  $m/z$  462.1  $[\text{M} + \text{H}]^+$ , purity: >99.9% @ 254 nm.

### Compound 14:

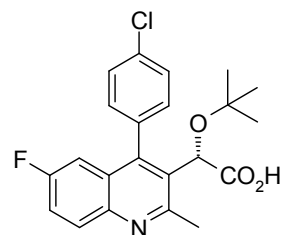

**14**

$^1\text{H}$  NMR: 13.1 (br, 1H), 8.07-8.04 (m, 1H), 7.74-7.64 (m, 3H), 7.47-7.42 (m, 2H), 6.90-6.86 (m, 1H), 4.99 (s, 1H), 2.73 (s, 3H), 0.90 (s, 9H). HRMS:  $m/z$  calc. for  $\text{C}_{22}\text{H}_{21}\text{ClFNO}_3 + \text{H}^+$ : 402.1267,  $m/z$  found: 402.1257 (-2.4 ppm). UPLC-MS:  $rt = 1.13$  min,  $m/z$  402.2  $[\text{M} + \text{H}]^+$ , purity: >99.9% @ 254 nm.

Compound 15:

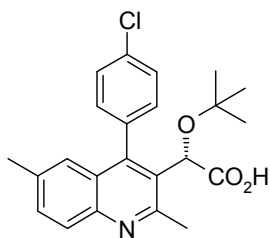

15

$^1\text{H}$  NMR: 13.2 (br, 1H), 7.95 (d, 1H,  $J = 8.6$  Hz), 7.75-7.66 (m, 3H), 7.47-7.40 (m, 2H), 7.09 (s, 1H), 4.98 (s, 1H), 2.78 (s, 3H), 2.36 (s, 3H), 0.91 (s, 9H).  $^{13}\text{C}$  NMR: 172.8, 157.0, 137.2, 133.9, 133.5, 133.1 (br), 131.8, 131.4, 130.4, 128.9, 128.5, 125.7, 125.4 (br), 125.0, 75.7, 69.7, 27.7, 22.9, 21.3. HRMS:  $m/z$  calc. for  $\text{C}_{23}\text{H}_{24}\text{ClNO}_3 + \text{H}^+$ : 398.1517,  $m/z$  found: 398.1504 (-3.4 ppm). UPLC-MS:  $rt = 0.93$  min,  $m/z$  398.2  $[\text{M} + \text{H}]^+$ , purity: >99.9% @ 254 nm.

Compound 16:

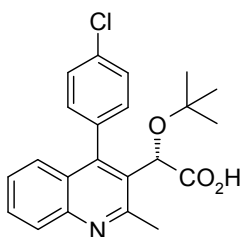

16

$^1\text{H}$  NMR: 13.0 (br, 1H), 7.97 (d, 1H,  $J = 8.1$  Hz), 7.75-7.71 (m, 2H), 7.69-7.66 (m, 1H), 7.49-7.45 (m, 2H), 7.42-7.39 (m, 1H), 7.25 (m, 1H), 5.00 (s, 1H), 2.74 (s, 3H), 0.90 (s, 9H). HRMS:  $m/z$  calc. for  $\text{C}_{22}\text{H}_{22}\text{ClNO}_3 + \text{H}^+$ : 384.1361,  $m/z$  found: 384.1351 (-2.5 ppm). UPLC-MS:  $rt = 0.94$  min,  $m/z$  384.3  $[\text{M} + \text{H}]^+$ , purity: >99.9% @ 254 nm.

Compound 17:

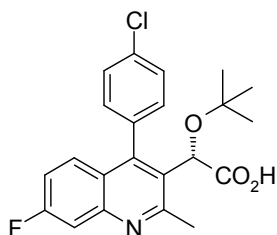

17

$^1\text{H}$  NMR: 13.1 (br, 1H), 7.74-7.66 (m, 3H), 7.48-7.38 (m, 3H), 7.33-7.29 (m, 1H), 4.98 (s, 1H), 2.74 (s, 3H), 0.90 (s, 9H). HRMS:  $m/z$  calc. for  $\text{C}_{22}\text{H}_{21}\text{ClFNO}_3 + \text{H}^+$ : 402.1267,  $m/z$  found: 402.1258 (-2.1 ppm). UPLC-MS:  $rt = 1.13$  min,  $m/z$  402.2  $[\text{M} + \text{H}]^+$ , purity: >99.9% @ 254 nm.

Compound 18:

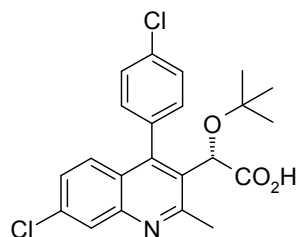

**18**

$^1\text{H}$  NMR: 13.1, (br, 1H), 8.02 (d, 1H,  $J = 2.2$  Hz), 7.74-7.67 (m, 2H), 7.52-7.41 (m, 3H), 7.27 (d, 1H,  $J = 9.0$  Hz), 4.98 (s, 1H), 2.74 (s, 3H), 0.90 (s, 9H). HRMS:  $m/z$  calc. for  $\text{C}_{22}\text{H}_{21}\text{Cl}_2\text{NO}_3 + \text{H}^+$ : 418.0971,  $m/z$  found: 418.0959 (- 2.8 ppm). UPLC-MS:  $rt = 1.25$  min,  $m/z$  418.2  $[\text{M} + \text{H}]^+$ , purity: >99.9% @ 254 nm.

**Compound 19:**

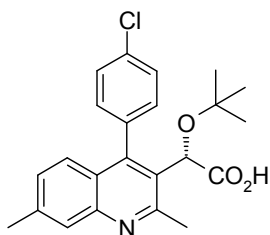

**19**

$^1\text{H}$  NMR: 13.2 (br, 1H), 7.83 (s, 1H), 7.76-7.73 (m, 1H), 7.71-7.68 (m, 1H), 7.48-7.46 (m, 1H), 7.44-7.39 (m, 2H), 7.25 (d, 1H,  $J = 8.6$  Hz), 5.03 (s, 1H), 2.81 (s, 3H), 2.52 (s, 3H), 0.92 (s, 9H).  $^{13}\text{C}$  NMR: 172.8, 158.3, 157.9, 134.0, 133.4, 131.7, 131.4, 129.7 (br), 129.6, 128.9, 128.4, 126.3, 124.1 (br), 123.8, 75.7, 69.6, 27.6, 22.8, 21.3. HRMS:  $m/z$  calc. for  $\text{C}_{23}\text{H}_{24}\text{ClNO}_3 + \text{H}^+$ : 398.1517,  $m/z$  found: 398.1503 (- 3.6 ppm). UPLC-MS:  $rt = 0.90$  min,  $m/z$  398.2  $[\text{M} + \text{H}]^+$ , purity: >99.9% @ 254 nm.

**Compound 20:**

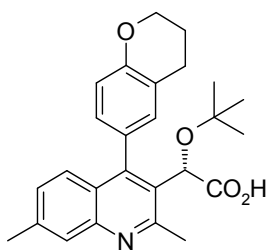

**20**

$^1\text{H}$  NMR: (1:1 ratio of conformers) 13.2 (br, 1H), 7.84 (s, 1H), 7.48-7.39 (m, 2H), 7.18-6.96 (m, 3H), 5.17 and 5.14 (s, 1H), 4.26-4.23 (m, 2H), 2.88-2.72 (m, 5H), 2.54 (s, 3H), 1.99-1.93 (m, 2H), 0.90 (m, 9H).  $^{13}\text{C}$  NMR: 172.9, 158.2, 157.9, 157.6, 155.3, 155.2, 131.3, 131.1, 130.2, 130.0, 128.6, 127.0, 125.4, 124.4, 122.7, 122.5, 116.6, 116.3, 75.8, 69.6, 69.5, 66.3, 66.2, 27.6, 27.5, 24.2, 22.0, 21.5, 21.4. HRMS:  $m/z$  calc. for  $\text{C}_{26}\text{H}_{29}\text{NO}_4 + \text{H}^+$ : 420.2169,  $m/z$  found: 420.2159 (- 2.4 ppm). UPLC-MS:  $rt = 0.78$  min,  $m/z$  420.3  $[\text{M} + \text{H}]^+$ , purity: >99.9% @ 254 nm.

Compound 21:

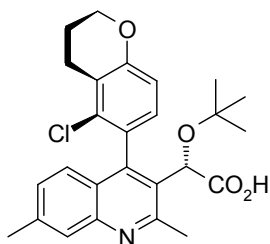

21

$^1\text{H}$  NMR: 12.7 (br, 1H), 7.79 (s, 1H), 7.39-7.33 (m, 1H), 7.08-7.03 (m, 1H), 6.97-6.90 (m, 2H), 5.06 (s, 1H), 4.23-4.20 (m, 2H), 2.89 (s, 3H), 2.82-2.73 (m, 2H), 2.06-2.00 (m, 2H), 1.04 (s, 9H). HRMS:  $m/z$  calc. for  $\text{C}_{26}\text{H}_{28}\text{ClNO}_4 + \text{H}^+$ : 454.1780,  $m/z$  found: 454.1767 (-2.8 ppm). UPLC-MS:  $rt = 86$  min,  $m/z$  454.3  $[\text{M} + \text{H}]^+$ , purity: 93.4% @ 254 nm.

Compound 22:

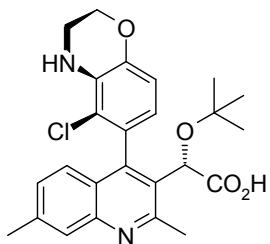

22

$^1\text{H}$  NMR: 12.8 (br, 1H), 7.79 (s, 1H), 7.39 (d, 1H,  $J = 8.5$  Hz), 7.11 (d, 1H,  $J = 8.7$  Hz), 6.84 (d, 1H,  $J = 8.2$  Hz), 6.37 (d, 1H,  $J = 8.2$  Hz), 5.94 (br, 1H), 5.09 (s, 1H), 4.23-4.21 (m, 2H), 3.43 (br, 2H), 2.89 (s, 3H), 2.51 (s, 3H), 1.05 (s, 9H). HRMS:  $m/z$  calc. for  $\text{C}_{25}\text{H}_{27}\text{ClN}_2\text{O}_4 + \text{H}^+$ : 455.1732,  $m/z$  found: 455.1718 (-3.2 ppm). UPLC-MS:  $rt = 0.75$  min,  $m/z$  455.3  $[\text{M} + \text{H}]^+$ , purity: 95.4% @ 254 nm.

Compound 23:

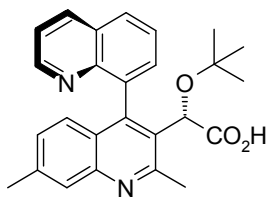

23

$^1\text{H}$  NMR: 12.6 (br, 1H), 8.63-8.61 (m, 1H), 8.53 (d, 1H,  $J = 7.8$  Hz), 8.23 (d, 1H,  $J = 8.1$  Hz), 7.91 (s, 1H), 7.79 (t, 1H,  $J = 7.9$  Hz), 7.63-7.55 (m, 2H), 7.34 (br, 1H), 6.98 (br, 1H), 4.95 (s, 1H), 3.04 (s, 3H), 2.53 (s, 3H), 0.78 (s, 9H). HRMS:  $m/z$  calc. for  $\text{C}_{26}\text{H}_{26}\text{N}_2\text{O}_3 + \text{H}^+$ : 415.2016,  $m/z$  found: 415.2001 (-3.7 ppm). UPLC-MS:  $rt = 0.67$  min,  $m/z$  415.3  $[\text{M} + \text{H}]^+$ , purity: 94.7% @ 254 nm.



Compound **24**:

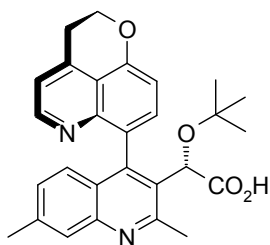

**24**

$^1\text{H}$  NMR: 12.4 (br, 1H), 8.52 (d, 1H,  $J = 4.4$  Hz), 7.73 (s, 1H), 7.43 (d, 1H,  $J = 7.8$  Hz), 7.30 (d, 1H,  $J = 4.4$  Hz), 7.12-7.09 (m, 2H), 6.82 (d, 1H,  $J = 8.5$  Hz), 4.96 (s, 1H), 4.57-4.47 (m, 2H), 3.36-3.30 (m, 2H), 2.83 (s, 3H), 2.44 (s, 3H), 0.82 (s, 9H). HRMS:  $m/z$  calc. for  $\text{C}_{28}\text{H}_{28}\text{N}_2\text{O}_4 + \text{H}^+$ : 457.2122,  $m/z$  found: 457.2108 (-3.1 ppm). UPLC-MS:  $rt = 0.68$  min,  $m/z$  457.3  $[\text{M} + \text{H}]^+$ , purity: >99.9% @ 254 nm.

Compound **26**:

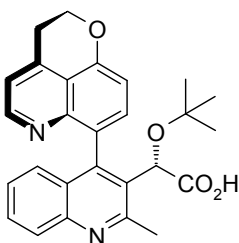

BI 224436  
**26**

$^1\text{H}$  NMR: 12.4 (br, 1H), 8.52 (d, 1H,  $J = 4.4$  Hz), 7.94 (d, 1H,  $J = 7.9$  Hz), 7.65-7.61 (m, 1H), 7.45 (d, 1H,  $J = 8.2$  Hz), 7.31-7.24 (m, 2H), 7.12 (d, 1H,  $J = 7.9$  Hz), 6.94-6.92 (m, 1H), 4.99 (s, 1H), 4.57-4.47 (m, 2H), 3.37-3.30 (m, 2H), 2.86 (s, 3H), 0.82 (s, 9H).  $^{13}\text{C}$  NMR: 172.2, 158.4, 153.1, 150.1, 146.6, 146.1, 145.0, 141.0, 130.8 (br), 130.6 (br), 128.9, 128.0, 127.2, 127.1 (br) 126.4, 125.6, 118.0, 116.7, 109.1, 75.2, 70.8, 65.6, 27.7, 27.5, 24.9. HRMS:  $m/z$  calc. for  $\text{C}_{27}\text{H}_{26}\text{N}_2\text{O}_4 + \text{H}^+$ : 443.1965,  $m/z$  found: 443.1951 (-3.2 ppm). UPLC-MS:  $rt = 0.68$  min,  $m/z$  443.3  $[\text{M} + \text{H}]^+$ , purity: >99.9% @ 254 nm.

### References.

1. Detailed experimental procedures for Schemes S1-S3 have been described. See ref. 2-4.
2. Tsantrizos, Y. S.; Boes, M.; Brochu, C.; Fenwick, C.; Malenfant, E.; Mason, S.; Pesant, M. Inhibitors of Human Immunodeficiency Virus Replication PCT Int. Appl. WO 2007/131350.
3. Bailey, M. D.; Bilodeau, F.; Carson, R. J.; Coulombe, R.; Fader, L.; Halmos, T.; Kawai, S.; Landry, S.; Laplante, S.; Morin, S.; Parisien, M.; Poupart, M.-A.; Simoneau, B.; Tsantrizos, Y. S. Inhibitors of human immunodeficiency virus replication. PCT Int. Appl. WO 2009/062285
4. Bailey, M. D.; Bilodeau, F.; Carson, R. J.; Fader, L.; Halmos, T.; Kawai, S.; Landry, S.; Laplante, S.; Simoneau, B.; Tsantrizos, Y. S. Inhibitors of human immunodeficiency virus replication. PCT Int. Appl. WO 2009/062289
5. Michel, P.; Ley, S. V. Butane-2,3-diacetals of glyceraldehyde: a stable alternative to glyceraldehyde acetonide. *Angewandte Chemie, International Edition* 2002, 41, 3898-3901.
6. Movassaghi, M.; Hill, M. D.; Ahmad, O. K.; Single-Step Synthesis of Pyridine Derivatives. *J. Am. Chem. Soc.* 2007, 129, 10096-10097.



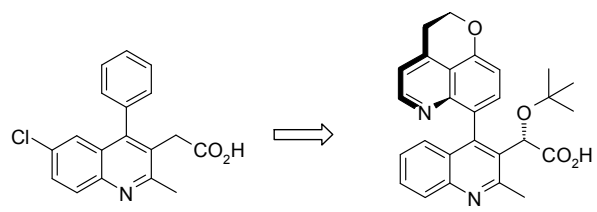

HTS hit  
**1a**

$EC_{50} = >40,000$  nM

BI 224436  
**22**

$EC_{50} = 11-27$  nM

---
